# Supplementary material for: Ethyl Acetate Fraction of Helianthus tuberosus L. Induces Anti-Diabetic, and Wound-Healing Activities in Insulin-Resistant Human Liver Cancer and Mouse Fibroblast Cells
Source: PubMed Central journal article supplement (PMC7828129; doi:10.3390/antiox10010099), 2021-01-12
Supplement: antioxidants-10-00099-s001.pdf [file antioxidants-10-00099-s001.pdf]

**Supplementary Table 1.** Lipinski's rule for of GC-MS based isolated compound from *H.tuberosus* assessed by the web tool of SwissADME.

| Compound                                 | Molecular Weight (Da) | Hydrogen Bond |          | LogP | Molar Refractivity | Rules Satisfied |
|------------------------------------------|-----------------------|---------------|----------|------|--------------------|-----------------|
|                                          |                       | Donor         | Acceptor |      |                    |                 |
| Salicylic acid $\beta$ -D-glucoside      | 299.07                | 5             | 8        | 0.98 | 67.55              | 5/5             |
| Neochlorogenic acid                      | 353.08                | 6             | 9        | 0.96 | 83.50              | 4/5             |
| Caffeic acid                             | 179.03                | 3             | 4        | 0.97 | 47.16              | 5/5             |
| 5-O-(4-Coumaroyl)-D-quinic acid          | 337.09                | 5             | 8        | 1.08 | 81.48              | 5/5             |
| Feruloylquinic acid                      | 367.10                | 5             | 9        | 1.47 | 87.97              | 5/5             |
| Cryptochlorogenic acid                   | 353.08                | 6             | 9        | 1.23 | 83.50              | 5/5             |
| Pinellic acid                            | 329.23                | 4             | 5        | 2.24 | 93.42              | 5/5             |
| Caffeoylquinic acid                      | 354.31                | 6             | 9        | 0.96 | 83.50              | 4/5             |
| Isoxazolidine                            | 73.09                 | 1             | 2        | 1.22 | 22.22              | 4/5             |
| $\beta$ -Bourbonene                      | 204.35                | 0             | 0        | 3.34 | 67.14              | 3/5             |
| 3-(4-Methylpiperidin-1-yl)propan-1-amine | 156.27                | 1             | 2        | 2.29 | 52.78              | 5/5             |
| Carbamic acid                            | 61.04                 | 2             | 2        | 0.20 | 11.79              | 4/5             |
| 4-Amino-1,2,5-oxadiazol-3-ol             | 101.06                | 2             | 3        | 0.20 | 21.53              | 4/5             |
| Pent-4-enamide                           | 99.13                 | 1             | 1        | 1.20 | 28.58              | 4/5             |
| Morpholinoacetonitrile                   | 126.16                | 0             | 3        | 1.49 | 36.49              | 3/5             |
| 3-Pyrrolidinol                           | 87.12                 | 2             | 2        | 1.20 | 27.11              | 4/5             |
| 1,4 Dicafeoylquinic acid                 | 516.45                | 7             | 12       | 1.91 | 126.60             | 3/5             |
| Camphene                                 | 136.23                | 0             | 0        | 2.58 | 45.22              | 3/5             |
| Hexanoic acid                            | 116.16                | 2             | 4        | 1.57 | 32.73              | 4/5             |
| $\alpha$ -murrolene                      | 204.35                | 0             | 0        | 3.38 | 69.04              | 3/5             |
| Cyclopentanol                            | 86.13                 | 1             | 1        | 1.59 | 25.20              | 4/5             |

**Supplementary Table 2.** Molecular interaction of the  $\alpha$ -Amylase and  $\alpha$ -Glycosidase active site with selective phytochemical inhibitors from *H. tuberosus*.

| PubChem ID                             | Phytochemical                            | Docking Score | No of H-bond | Interactive residues                           |                                                |
|----------------------------------------|------------------------------------------|---------------|--------------|------------------------------------------------|------------------------------------------------|
|                                        |                                          |               |              | H-Bond                                         | Hydrophobic bond                               |
| <b><math>\alpha</math>-Amylase</b>     |                                          |               |              |                                                |                                                |
| 5280633                                | Neochlorogenic acid                      | -7.45264      | 2            | Asp300, Gln63, Glu233                          | TRP59, LEU162, Asp300,                         |
| 689043                                 | Caffeic acid                             | -6.99116      | 3            | Arg389, Glu390, Cys378                         | Arg389, Trp388, Cys384, Thr377                 |
| 9798666                                | Cryptochlorogenic acid                   | -9.86082      | 4            | Glu390, Glu484, Val383, Arg343                 | Glu484, Ala318, Val348                         |
| 10155076                               | Caffeoylquinic acid                      | -9.32055      | 3            | Asp300, Glu233, Gln63                          | TRP59, Asp300, Leu162                          |
| 3149264                                | 3-(4-Methylpiperidin-1-yl)propan-1-amine | -7.09424      | 2            | His299                                         | Trp59, Tyr62, Asp197, Glu233, Asp300           |
| 10133609                               | Feruloylquinic acid                      | -8.61385      | 3            | Tyr62, Ile235, Val234                          | Tyr62, Ile235, Lys200, Ala198, His201, Glu233  |
| <b><math>\alpha</math>-Glycosidase</b> |                                          |               |              |                                                |                                                |
| 5280633                                | Neochlorogenic acid                      | -10.7322      | 5            | Arg442, Gln279, His280, Thr310, Arg315         | Pro312, Phe159, Tyr158                         |
| 689043                                 | Caffeic acid                             | -8.83794      | 3            | Phe433, Ser236, Lys156                         | Ile419, Lys156                                 |
| 9798666                                | Cryptochlorogenic acid                   | -10.632       | 4            | Ser236, Asn317, His423, Asn235                 | Asn415, Phe314, His423                         |
| 10155076                               | Caffeoylquinic acid                      | -10.7379      | 6            | Arg442, Glu411, Gln279, His280, Thr310, Arg315 | Pro312, Phe159, Tyr158                         |
| 3149264                                | 3-(4-Methylpiperidin-1-yl)propan-1-amine | -7.34669      | 3            | Asp352, Gln353                                 | Asp352, Glu377, Val216, Tyr158, His112, Phe178 |
| 10133609                               | Feruloylquinic acid                      | -9.31426      | 4            | Asp69, Arg213, His351, Asp215                  | Tyr72, Gln279, Phe303, Gln353, Arg315          |
